# Supplementary material
Source: PubMed Central journal article supplement (PMC9119004)
Supplement: NIHMS1790550-supplement-Supplemental_Tables_1-4.pdf [file NIHMS1790550-supplement-Supplemental_Tables_1-4.pdf]

## Supplemental Material

### Supplemental Table 1. CMG discovery case summary sheet

See supplemental excel

### Supplemental Table 2. CMG data sharing details

| Center                   | ClinVar Name                                                                              | ClinVar URL                                                                                                                   | dbGaP/AnVIL Study accession ID |
|--------------------------|-------------------------------------------------------------------------------------------|-------------------------------------------------------------------------------------------------------------------------------|--------------------------------|
| Baylor-Hopkins           | Lupski Lab, Baylor-Hopkins CMG, BHCMG                                                     | <a href="https://www.ncbi.nlm.nih.gov/clinvar/submitters/505572/">https://www.ncbi.nlm.nih.gov/clinvar/submitters/505572/</a> | phs000711                      |
| Baylor-Hopkins           | Baylor-Hopkins Center for Mendelian Genomics (Johns Hopkins University)                   | <a href="https://www.ncbi.nlm.nih.gov/clinvar/submitters/505755/">https://www.ncbi.nlm.nih.gov/clinvar/submitters/505755/</a> | phs000711                      |
| Broad Institute          | Broad Institute Rare Disease Group (Broad Institute)                                      | <a href="https://www.ncbi.nlm.nih.gov/clinvar/submitters/506627/">https://www.ncbi.nlm.nih.gov/clinvar/submitters/506627/</a> | phs001272                      |
| University of Washington | University of Washington Center for Mendelian Genomics (University of Washington), UW-CMG | <a href="https://www.ncbi.nlm.nih.gov/clinvar/submitters/505516/">https://www.ncbi.nlm.nih.gov/clinvar/submitters/505516/</a> | phs000693                      |
| Yale                     | Yale Center for Mendelian Genomics (Yale University)                                      | <a href="https://www.ncbi.nlm.nih.gov/clinvar/submitters/506150/">https://www.ncbi.nlm.nih.gov/clinvar/submitters/506150/</a> | phs000744                      |

### Supplemental Table 3. CMG AnVIL metadata dictionary and example files

See supplemental excel

### Supplemental Table 4. Access Levels in AnVIL

| Access type       | Description                                                                                                                                                                                          | Example Dataset                                                                                         | Additional documentation                                                                                                                                                                                                  |
|-------------------|------------------------------------------------------------------------------------------------------------------------------------------------------------------------------------------------------|---------------------------------------------------------------------------------------------------------|---------------------------------------------------------------------------------------------------------------------------------------------------------------------------------------------------------------------------|
| Open Access       | These data sets and tools are accessible to anyone with an AnVIL, Terra or Gen3 account.                                                                                                             | 1000 Genomes                                                                                            | <a href="https://anvilproject.org/learn">https://anvilproject.org/learn</a>                                                                                                                                               |
| Controlled-Access | Access to these data sets is managed by a data access committee designated by dbGaP and is based on intended use of the requester and allowed use of the data submitter as defined by consent codes. | CMG cohorts, GTEx                                                                                       | <a href="https://anvilproject.org/learn/accessing-data/requesting-data-access#accessing-controlled-access-data">https://anvilproject.org/learn/accessing-data/requesting-data-access#accessing-controlled-access-data</a> |
| Consortium Access | These data sets are accessible to consortia members and controlled under the consortium's data sharing agreement.                                                                                    | Centers for Common Disease Genomics (CCDG), Cohorts that are not yet released from their embargo period | <a href="https://anvilproject.org/learn/for-consortia/consortium-data-access-guidelines">https://anvilproject.org/learn/for-consortia/consortium-data-access-guidelines</a>                                               |
